# Supplementary material
Source: PubMed Central journal article supplement (PMC8387941)
Supplement: jamadermatol-e213161-s002.pdf [file jamadermatol-e213161-s002.pdf]

## Supplementary Online Content

Lukowiak TM, Perz AM, Veerabagu SA, et al. Patient quality of life after interpolated flap repair of nasal Mohs surgery defects: a multicenter prospective cohort study. *JAMA Dermatol*. Published online August 25, 2021.  
doi:10.1001/jamadermatol.2021.3161

**eTable 1.** Skin Cancer Index

**eTable 2.** Mean Overall SCI Score by Time Point and Interpolation Flap Type

**eFigure 1.** Enrollment, Participation, and Inclusion of Study Participants

**eFigure 2.** Change in Mean Overall SCI and Subscale Scores Over Time

This supplementary material has been provided by the authors to give readers additional information about their work.

**eTable 1. Skin Cancer Index**

| <b>During the past month, how much have you...</b>                         | <b>Very Much</b>         | <b>Quite a Bit</b>       | <b>Moderately</b>        | <b>A Little Bit</b>      | <b>Not at All</b>        |
|----------------------------------------------------------------------------|--------------------------|--------------------------|--------------------------|--------------------------|--------------------------|
| 1. Worried that your skin cancer will spread to another part of your body? | <input type="checkbox"/> |
| 2. Felt anxious about your skin cancer?                                    | <input type="checkbox"/> |
| 3. Worried that family members may also develop skin cancer?               | <input type="checkbox"/> |
| 4. Worried about the cause of skin cancer?                                 | <input type="checkbox"/> |
| 5. Felt frustrated about your skin cancer?                                 | <input type="checkbox"/> |
| 6. Worried that your tumor may become a more serious type of skin cancer?  | <input type="checkbox"/> |
| 7. Worried about new skin cancers occurring in the future?                 | <input type="checkbox"/> |
| 8. Felt uncomfortable when meeting new people?                             | <input type="checkbox"/> |
| 9. Felt concerned that your skin cancer may worry friends or family?       | <input type="checkbox"/> |
| 10. Worried about the length of time before you can go out in public?      | <input type="checkbox"/> |
| 11. Felt bothered by people's questions related to your skin cancer?       | <input type="checkbox"/> |
| 12. Felt embarrassed by your skin cancer?                                  | <input type="checkbox"/> |
| 13. Worried about how large the scar will be?                              | <input type="checkbox"/> |
| 14. Thought about how skin cancer affects your attractiveness?             | <input type="checkbox"/> |
| 15. Thought about how noticeable the scar will be to others?               | <input type="checkbox"/> |

**eTable 2.** Mean Overall SCI Score by Time Point and Interpolation Flap Type

|                                                                                                                                                                                                                                 | <b>Pre-MMS*</b>    | <b>1 Week After Flap Placement</b> | <b>4 Weeks After Flap Takedown</b> | <b>16 Weeks After Flap Takedown*</b> |
|---------------------------------------------------------------------------------------------------------------------------------------------------------------------------------------------------------------------------------|--------------------|------------------------------------|------------------------------------|--------------------------------------|
| <b>Completed Surveys (n)</b>                                                                                                                                                                                                    | 147                | 117                                | 142                                | 147                                  |
| <b>All Flaps</b>                                                                                                                                                                                                                |                    |                                    |                                    |                                      |
| Mean SCI score                                                                                                                                                                                                                  | 53.63              | 50.62                              | 56.18                              | 60.74                                |
| 95% CI                                                                                                                                                                                                                          | 51.65 to 55.60     | 47.90 to 53.33                     | 53.96 to 58.39                     | 58.92 to 62.56                       |
| <b>Cheek-to-nose Flap</b>                                                                                                                                                                                                       |                    |                                    |                                    |                                      |
| N,%                                                                                                                                                                                                                             | 57.82%<br>(85/147) | 59.83%<br>(70/117)                 | 58.45%<br>(83/142)                 | 57.82 (85/147)                       |
| Mean SCI score                                                                                                                                                                                                                  | 53.42              | 51.46                              | 56.69                              | 60.48                                |
| 95% CI                                                                                                                                                                                                                          | 50.74 to 56.10     | 47.76 to 55.16                     | 53.67 to 59.70                     | 57.86 to 63.11                       |
| <b>Forehead Flap</b>                                                                                                                                                                                                            |                    |                                    |                                    |                                      |
| N,%                                                                                                                                                                                                                             | 42.18%<br>(62/147) | 40.17%<br>(47/117)                 | 41.55%<br>(59/142)                 | 42.18%<br>(62/147)                   |
| Mean SCI score                                                                                                                                                                                                                  | 53.9               | 49.36                              | 55.46                              | 61.1                                 |
| 95% CI                                                                                                                                                                                                                          | 50.91 to 56.89     | 45.29 to 53.43                     | 52.13 to 58.79                     | 58.63 to 63.56                       |
| <p><i>*N reflects the 147 study participants who completed both pre-MMS and 16-Weeks SCI surveys <u>in their entirety</u>. Partially completed surveys are unable to be scored and thus were removed from the analysis.</i></p> |                    |                                    |                                    |                                      |
| <p><i>*Reflects the number of surveys <u>completed in their entirety</u> at this time point, from within the analytic cohort (147).</i></p>                                                                                     |                    |                                    |                                    |                                      |

**eFigure 1.** Enrollment, Participation, and Inclusion of Study Participants

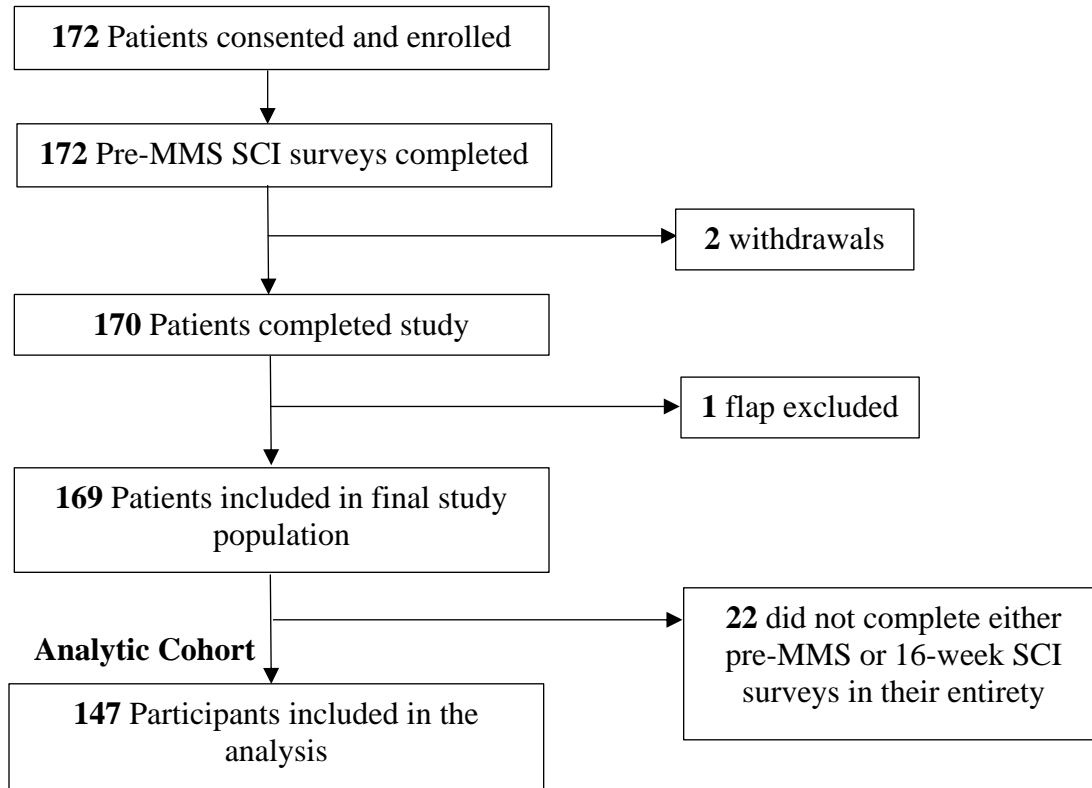

**eFigure 2.** Change in Mean Overall SCI and Subscale Scores Over Time

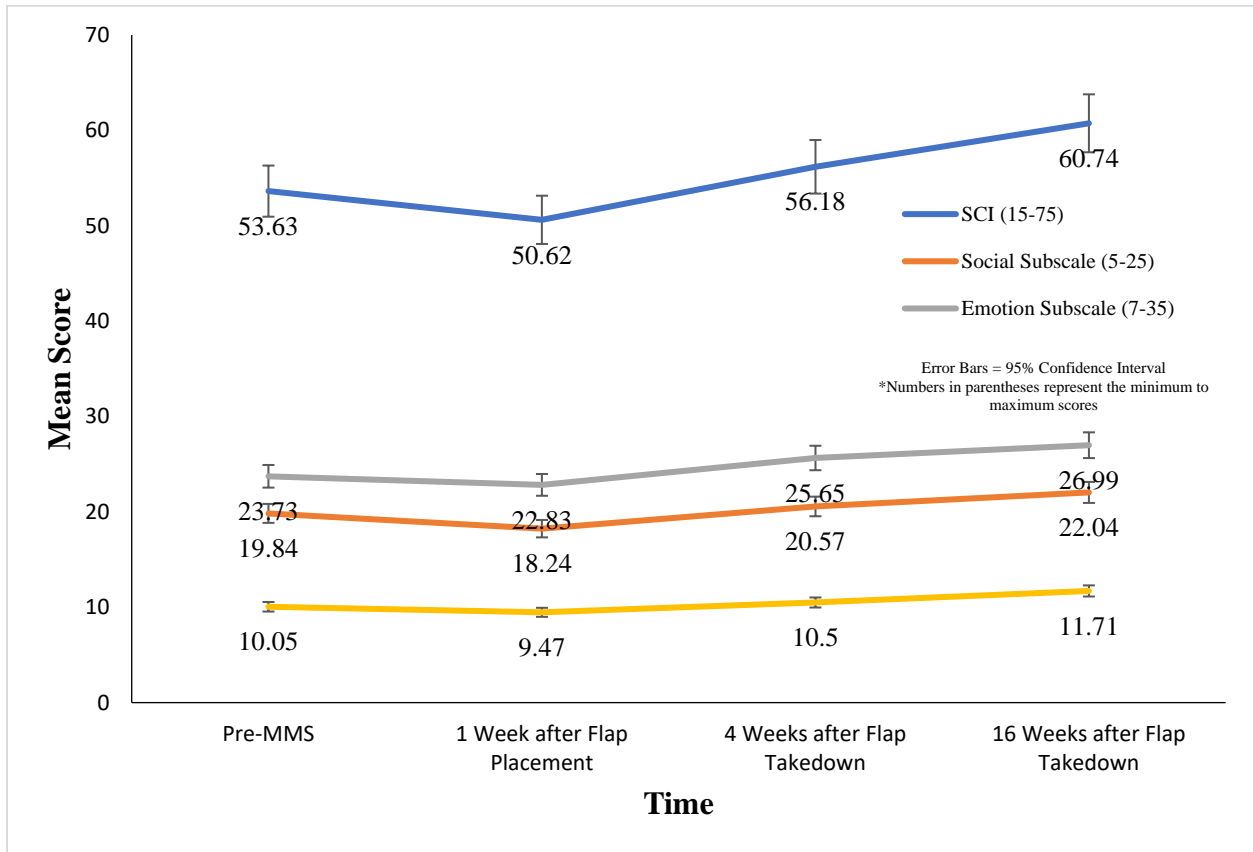

The cohort of participants at each time point is defined by the number of completed surveys, in their entirety, at that time point: pre-MMS (n=147), 1-week after flap placement (n=117), 4-weeks after flap takedown (n=142), and 16-weeks after flap takedown (147).
